# Supplementary material
Source: PubMed Central journal article supplement (PMC4038129)

## SUPPLEMENTAL FIGURE S1

Garg, S., Wang, W., Biju, P.G., Boerma, M., Wang, J., Daohong, Z., Hauer-Jensen, M.

**Bone Marrow Transplantation In Mice Helps Restore The Intestinal Mucosal Barrier after Total Body Irradiation.** *Radiat. Res.*

**Homing of transplanted BMCs as detected by presence of GFP- positive macrophages in the mouse small intestine on day 7 post-irradiation.** CD68-positive cells were mainly seen in the lamina propria of villi. Most, if not all, GFP-positive cells were CD68-positive (as shown by arrows). (A) GFP-positive cells were shown by Alexa Fluor 488. (B) CD68-positive cells shown by Dylight 594. (C) Nuclei stained with DAPI. (D) Merged image of A, B, and C. Bar= 50 $\mu$ m.

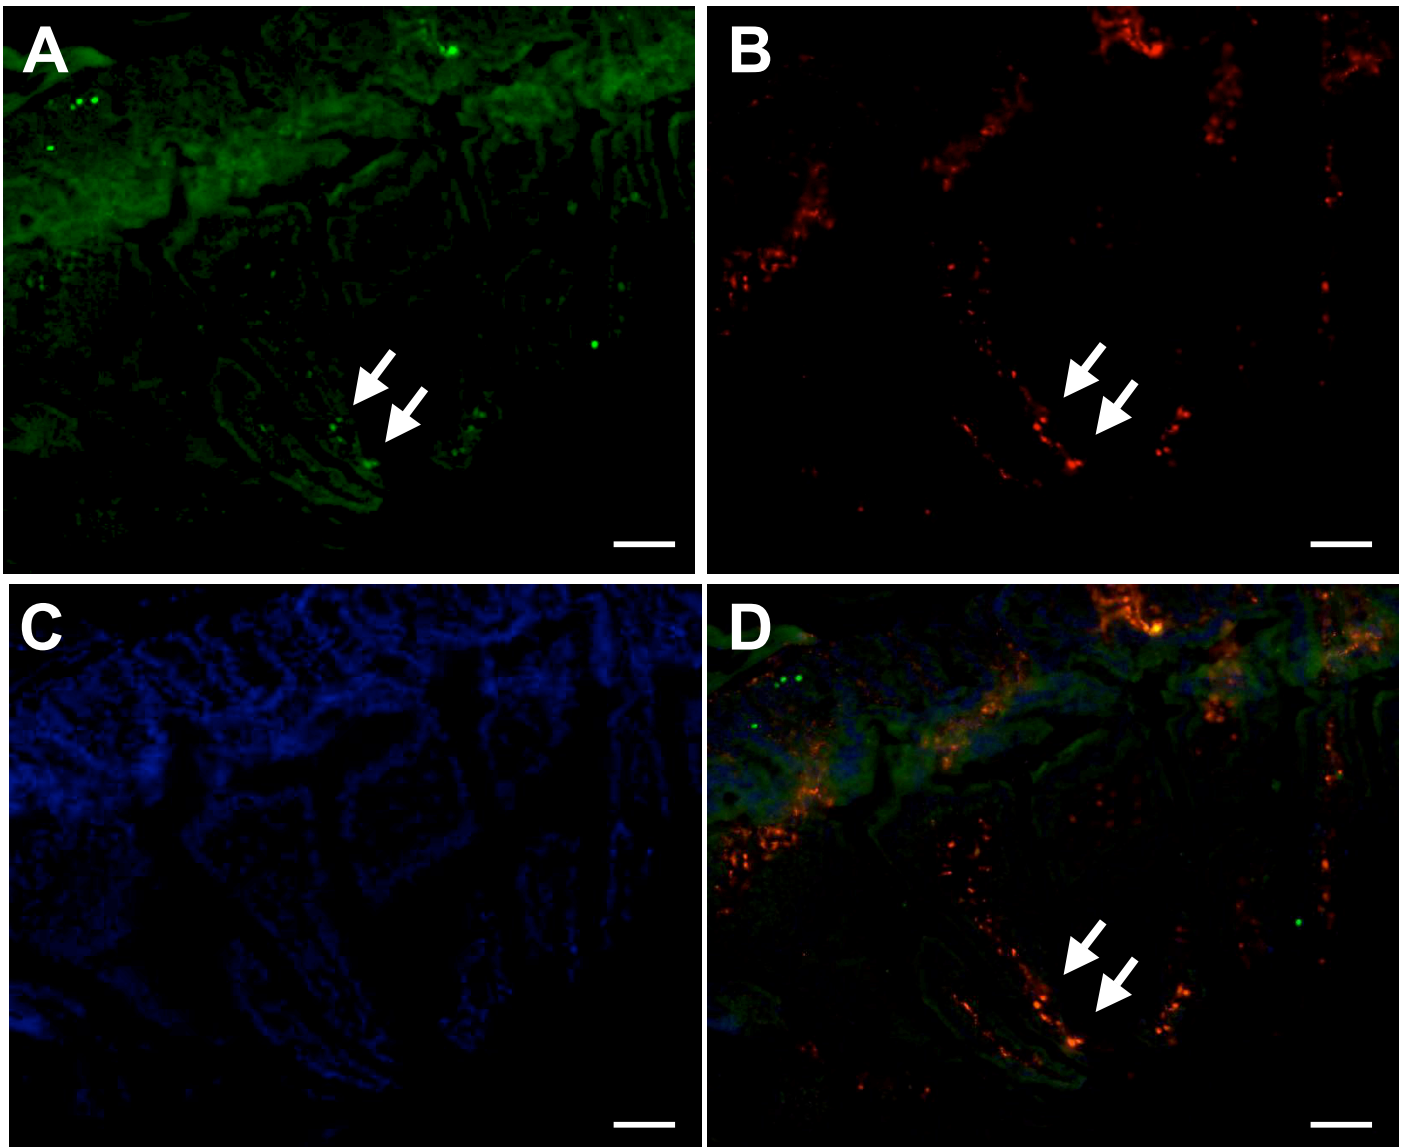

Supplement: NIHMS582918-supplement-Supplementary_file.pdf [file NIHMS582918-supplement-Supplementary_file.pdf]
